# Supplementary material
Source: publisher site journal article supplement (https://www.degruyterbrill.com/publication/isbn/9783110268164/downloadAsset/9783110268164_Contents.pdf)
Supplement: Supplementary file 1 [file 9783110268164_Contents.pdf]

# Table of Contents

**Acknowledgments — vii**

**List of Tables — xi**

**List of Illustrations — xii**

## **Chapter 1: Introduction — 1**

The Story of a Minority — 1

Jewish Patriotism — 10

The Judenzählung of 1916 — 14

Jewish Participation in the German War Effort — 16

## **Chapter 2: Religion at the Front — 19**

## **Chapter 3: Encountering Eastern European Jewry — 71**

Discomforting Encounters — 75

Neutral Encounters — 82

Comforting Encounters — 87

## **Chapter 4: Antisemitism and Integration — 95**

Experiencing Antisemitism — 96

Promotion of Jewish Soldiers as Officers — 100

Jewish Reserve Officers Before the War — 105

Evidence for Integration in the Bavarian Army

During the War — 111

Integration Without Antisemitism — 127

## **Afterword — 129**

The Germanness of the German Jew — 129

**Appendix: A Selection of Cited Sources from the *Allgemeine Zeitung des Judentums* — 131**

**Bibliography — 167**

Primary Sources — **167**

Secondary Sources — **169**

**Index of Persons — 179**
